# Supplementary material
Source: MDPI journal article supplement (https://www.mdpi.com/2073-4344/13/8/1170)
Supplement: s1 [file s1]

## Supplementary material

# Catalytic Microwave-Assisted Pyrolysis of the Main Residue of the Brewing Industry

Fernanda Pimenta, Elmis Filho, Ângelo Diniz and Marcos A. S. Barrozo \*

Chemical Engineering School, Federal University of Uberlândia, Uberlândia 38408-100, Brazil

\* Correspondence: masbarrozo@ufu.br; Fax: +55-34-32394188

**Table S1.** % Area from GC/MS results for the liquid product from the CCD runs of the catalytic MAP.

| Compound                            | Run  |      |      |      |      |      |      |      |       |      |
|-------------------------------------|------|------|------|------|------|------|------|------|-------|------|
|                                     | 1    | 2    | 3    | 4    | 5    | 6    | 7    | 8    | 9     | 10   |
| Phenol, 4-methyl-                   | 6.24 | 5.81 | 5.35 | 3.06 | 4.72 | 5.22 | 5.64 | 6.27 | 6.36  | 4.58 |
| Phenol                              | 5.78 | 5.35 | 5.66 | 1.79 | 0.46 | 4.81 | 4.66 | 6.05 | 5.35  | 4.16 |
| Phenol, 2-methyl-                   | 2.28 | 4.4  | 4    | 3.8  | 2.43 | 4.03 | 4.25 | 4.52 | 5.07  | 4.39 |
| Phenol, 2,3-dimethyl-               | 1.87 | 1.78 | 1.53 | 1.62 | 0.97 | 1.69 | 1.81 | 1.74 | 1.97  | 1.73 |
| Indene                              | 1.76 | 1.95 | 3.81 | 2.16 | 3    | 3.65 | 1.97 | 2.96 | 3.29  | 2.05 |
| 1-Tridecene                         | 1.65 | 1.87 | 2.61 | 1.47 | 1.86 | 2.66 | 3.17 | 1.48 | 3.05  | 1.86 |
| Hexadecanenitrile                   | 1.51 | 1.9  | 1.49 | 1.57 | 2.13 | 1.75 | 2.16 | 1.53 | 1.28  | 1.61 |
| 1-Dodecene                          | 1.46 | 1.57 | 1.33 | 1.48 | 0.95 | 1.29 | 1.75 | 1.5  | 1.38  | 1.57 |
| Hexadecanoic acid, methyl ester     | 1.37 | 1.66 | 0.98 | 2.35 | 1.62 | 1.41 | 1.7  | 1.09 | 1.1   | 1.4  |
| Naphthalene, 1-methyl-              | 1.34 | 4.14 | 4.63 | 1.75 | 0.8  | 5.07 | 3.3  | 3.88 | 6.38  | 4.94 |
| Styrene                             | 1.34 | 1.1  | 3.44 | 2.88 | 2.3  | 2.99 | 2.58 | 3.33 | 1.55  | 1.48 |
| Benzene, pentyl-                    | 1.2  | 1.12 | 0.84 | 1.23 | 1.08 | 0.84 | 1.14 | 0.84 | 1.01  | 1.16 |
| 1-Undecene                          | 1.17 | 1.15 | 1.03 | 1.44 | 0.84 | 0.33 | 1.65 | 1.27 | 0.91  | 1.11 |
| Toluene                             | 0.99 | 0.88 | 3.62 | 5.17 | 4.44 | 3.86 | 4.45 | 4.38 | 0.56  | 0.99 |
| Octadecanoic acid, 2-propenyl ester | 0.99 | 0.79 | 0.76 | 0.92 | 3.37 | 0.74 | 0.72 | 0.84 | 0.89  | 0.94 |
| o-Xylene                            | 0.66 | 0.67 | 2.51 | 3.29 | 0.66 | 2.76 | 3.15 | 2.98 | 0.55  | 0.7  |
| 2-Nonadecanone                      | 4.16 | 4.67 | 3.24 | 1.59 | 0    | 1.89 | 5.33 | 3.32 | 3.38  | 4.52 |
| Pentadecane                         | 3.88 | 7.31 | 2.93 | 3.72 | 4.69 | 3.16 | 3.37 | 0    | 3.96  | 4.58 |
| Hexadecane                          | 2.61 | 0.88 | 1.43 | 0.7  | 1.85 | 0    | 3.35 | 4.7  | 1.28  | 4.93 |
| Pyrrole                             | 2.23 | 1.6  | 2.22 | 1.63 | 0    | 1.65 | 2.43 | 3.8  | 0.43  | 0.8  |
| 1H-Indene, 1-methyl-                | 1.61 | 0.76 | 1.88 | 1.56 | 0    | 1.8  | 1.64 | 0.66 | 3.44  | 0.99 |
| Phenol, 2-methoxy-                  | 1.51 | 0.96 | 0.72 | 1.06 | 0.95 | 0.72 | 0.81 | 0    | 0.77  | 0.79 |
| Dodecane                            | 1.11 | 1.39 | 0.79 | 2.01 | 0    | 1.02 | 1.5  | 0.75 | 0.68  | 1.35 |
| Undecane                            | 0.75 | 0.88 | 0.59 | 1.99 | 0    | 0.73 | 1.19 | 0.69 | 0.59  | 0.87 |
| Azulene                             | 5.41 | 0    | 9.19 | 4.68 | 3.54 | 7.64 | 0    | 6.3  | 10.55 | 6.88 |
| Benzyl nitrile                      | 1.25 | 0.62 | 0.68 | 1.03 | 0.8  | 1.28 | 0    | 0    | 0.89  | 0.74 |
| Tetradecane                         | 0.72 | 1.03 | 0.6  | 2.25 | 0.71 | 2.97 | 0    | 0.57 | 1.86  | 0    |
| Biphenylene                         | 0    | 0.88 | 1.22 | 0.8  | 0.94 | 1.43 | 0    | 0.46 | 1.6   | 1.41 |
| 2-Methoxy-4-vinylphenol             | 5.05 | 3.46 | 0    | 1.76 | 7.68 | 3.76 | 3.01 | 0    | 0     | 4.46 |
| Indole                              | 2.36 | 2.67 | 0    | 2.37 | 1.95 | 3.16 | 0    | 2.77 | 3.49  | 0    |
| Tetradecanamide                     | 1.33 | 1.36 | 1.74 | 1.54 | 2.62 | 1.66 | 1.15 | 0    | 0     | 0    |

|                                         |      |      |      |      |      |      |      |      |      |      |
|-----------------------------------------|------|------|------|------|------|------|------|------|------|------|
| Ethylbenzene                            | 0.86 | 0    | 1.39 | 2    | 1.64 | 1.32 | 1.6  | 1.79 | 0    | 0    |
| Benzene, butyl-                         | 0.68 | 0    | 0    | 0.89 | 0.64 | 0    | 0.6  | 0.5  | 0.42 | 0.6  |
| 2-Cyclopenten-1-one, 2,3-dimethyl-      | 0    | 1.49 | 1.32 | 0.89 | 0    | 0.93 | 1.36 | 0    | 0.87 | 0.96 |
| 1H-Indole, 3-methyl-                    | 0    | 0.83 | 0    | 2.84 | 0.72 | 0.85 | 0    | 0.46 | 0.47 | 0.92 |
| Benzene, 2-propenyl-                    | 0    | 0    | 1.26 | 0.75 | 0    | 0.77 | 0.54 | 1.24 | 0.6  | 0.73 |
| 1-Pentadecene                           | 2.22 | 3.22 | 0    | 3.33 | 0    | 0.77 | 0    | 0    | 0.52 | 1.12 |
| Benzene, heptyl-                        | 0.75 | 0.89 | 0    | 0.78 | 0.7  | 0    | 0    | 0    | 1.03 | 0.85 |
| Benzene, (1,3-dimethylbutyl)-           | 0.7  | 0.79 | 0    | 0.69 | 0    | 0    | 0.55 | 0    | 0.56 | 0.73 |
| 2-Cyclopenten-1-one, 2-methyl-          | 1.49 | 1.05 | 0.75 | 0    | 0    | 0    | 0.97 | 1.25 | 0    | 0    |
| Benzene, hexyl-                         | 0.76 | 0.78 | 0    | 0.78 | 0.71 | 0    | 0    | 0    | 0    | 0.82 |
| 8-Heptadecene                           | 0    | 1.04 | 0    | 0.88 | 1.16 | 0.69 | 0    | 0    | 0    | 1.48 |
| Benzene, 1-ethenyl-3-methyl-            | 0    | 0    | 0.76 | 0    | 0    | 0.75 | 0.55 | 0.71 | 0.61 | 0    |
| Benzene, 1,2,3-trimethyl-               | 0    | 0    | 0.65 | 0    | 0    | 0.77 | 0.99 | 0.84 | 0    | 0.67 |
| 1-Decene                                | 0    | 0    | 0.62 | 1.99 | 0.71 | 0    | 1.04 | 0.87 | 0    | 0    |
| 2-Furanmethanol                         | 2.14 | 1.15 | 1.16 | 0    | 0    | 0    | 0    | 1.84 | 0    | 0    |
| Cyclopropylphenylmethane                | 0.81 | 0    | 0.6  | 0    | 0    | 0    | 0.67 | 0    | 0    | 0.71 |
| Phenol, 2-methoxy-4-methyl-             | 0.75 | 0    | 0    | 0.69 | 0.83 | 0    | 0    | 0    | 0.61 | 0    |
| Benzonitrile                            | 0.68 | 0    | 1.34 | 0    | 0    | 0.97 | 0    | 0    | 0.97 | 0    |
| Benzylmalonic acid                      | 0    | 0.77 | 0    | 0    | 0    | 0.59 | 0    | 0.63 | 0.69 | 0    |
| Biphenyl                                | 0    | 0    | 1.13 | 0    | 0    | 1.4  | 0    | 0    | 1.81 | 0.69 |
| Isoquinoline                            | 0    | 0    | 0.83 | 0    | 0    | 0.65 | 0    | 0.55 | 0.98 | 0    |
| Decane                                  | 0    | 0    | 0    | 0.84 | 0    | 0.57 | 1.05 | 0.66 | 0    | 0    |
| Benzene, 1-ethyl-2-methyl-              | 0    | 0    | 0    | 0.7  | 0    | 0.68 | 0.68 | 0.6  | 0    | 0    |
| 2-Cyclopenten-1-one, 3-methyl-          | 0.9  | 0.68 | 0    | 0    | 0    | 0    | 0    | 0.83 | 0    | 0    |
| 2,4-Hexadiene, 2,3-dimethyl-            | 0.76 | 0.73 | 0    | 0    | 0    | 0.86 | 0    | 0    | 0    | 0    |
| 2-Decanone                              | 0.73 | 0.79 | 0    | 0    | 0    | 0    | 0    | 0    | 0    | 0.67 |
| Benzene,1-methyl-1,2-propadienyl-       | 0    | 1.02 | 0    | 0    | 0    | 0    | 0    | 0    | 0.77 | 2.38 |
| Phenol, 2-methoxy-4-(1-propenyl)-, (E)- | 0    | 0.72 | 0    | 0.79 | 0.9  | 0    | 0    | 0    | 0    | 0    |
| 5H-1-Pyridine                           | 0    | 0    | 2.9  | 0    | 0    | 0    | 2.59 | 0    | 0    | 5.26 |
| Benzene, 1-butyryl-                     | 0    | 0    | 1.07 | 0    | 0    | 1.06 | 0    | 0.52 | 0    | 0    |
| Anthracene                              | 0    | 0    | 0.9  | 0    | 0    | 0.73 | 0    | 0    | 0.93 | 0    |
| Benzene, (cyclopropylidenemethyl)-      | 0    | 0    | 0.68 | 0    | 0    | 0.59 | 0    | 0.62 | 0    | 0    |
| 9,12-Octadecadienoic acid, methyl ester | 0    | 0    | 0    | 0.83 | 1.05 | 0    | 0.48 | 0    | 0    | 0    |
| Benzene, propyl-                        | 0    | 0    | 0    | 0.75 | 0    | 0    | 0.5  | 0.6  | 0    | 0    |
| Octadecanamide                          | 0    | 0    | 0    | 0    | 0    | 0    | 0    | 1.43 | 1.14 | 1.38 |
| 1-Methyl-2-methylenecyclohexane         | 0.86 | 0.8  | 0    | 0    | 0    | 0    | 0    | 0    | 0    | 0    |
| 1-Hexadecanol                           | 0.76 | 0    | 0    | 0    | 0    | 0    | 0    | 0    | 0    | 0.63 |
| Ethanone, 1-(2-furanyl)-                | 0.74 | 0    | 0    | 0    | 0    | 0    | 0    | 0.55 | 0    | 0    |
| 2-Nonenal, (E)-                         | 0    | 6    | 0    | 0    | 0    | 0    | 0    | 0    | 0    | 5.97 |
| Ethanone, 1-cyclododecyl-               | 0    | 0.79 | 0    | 0    | 0    | 0    | 0    | 0    | 0    | 0.68 |
| n-Hexadecanoic acid                     | 0    | 0    | 0.87 | 0    | 6.64 | 0    | 0    | 0    | 0    | 0    |
| 4-Octyne                                | 0    | 0    | 0.76 | 0    | 0    | 0    | 1.06 | 0    | 0    | 0    |
| Phenol, 4-ethyl-2-methoxy-              | 0    | 0    | 0    | 2.78 | 2.57 | 0    | 0    | 0    | 0    | 0    |
| 1-Nonene                                | 0    | 0    | 0    | 0.71 | 0    | 0    | 0.74 | 0    | 0    | 0    |

[illegible]
